# Supplementary material
Source: ML conference proceedings conference paper supplement (https://aclanthology.org/2022.acl-long.582)

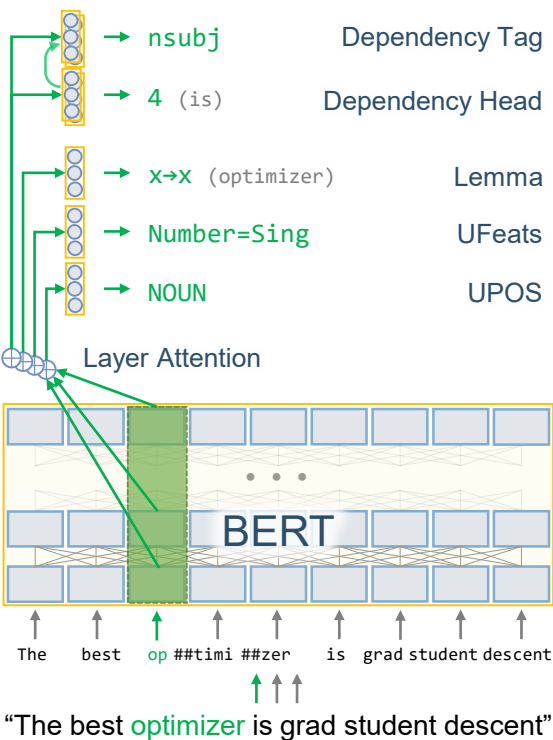

Supplement: software [file 2022.acl-long.582.software.zip]
